# Supplementary material for: Molten salt-assisted synthesis of special open-cell Fe, N co-doped porous carbon as an efficient electrocatalyst for zinc–air batteries
Source: Royal Society of Chemistry journal article supplement (doi:10.1039/d1nj04582b), 2021-11-29
Supplement: d1nj04582b1.pdf [file d1nj04582b1.pdf]

## Supporting Information

### Molten salts-assisted synthesis of special open-cell Fe, N co-doped porous carbon as an efficient electrocatalyst for zinc-air batteries

Xiaoying Gao<sup>a</sup>, Xuan Xie<sup>a</sup>, Kanjun Sun<sup>b</sup>, Xiaofei Lei<sup>a</sup>, Tianyu Hou<sup>a</sup>, Hui Peng<sup>a\*</sup>, and Guofu Ma<sup>a\*</sup>

<sup>a</sup>Key Laboratory of Eco-functional Polymer Materials of the Ministry of Education, Key Laboratory of Polymer Materials of Gansu Province, College of Chemistry and Chemical Engineering, Northwest Normal University, Lanzhou 730070, China.

<sup>b</sup>College of Chemistry and Chemical Engineering, Lanzhou City University, Lanzhou 730070, China.

\*Corresponding authors. E-mail addresses: penghui@nwnu.edu.cn (H. Peng), magf@nwnu.edu.cn (G. Ma)

## S1. Materials characterizations

The morphology and microstructure of the as-prepared carbon materials were examined by field emission scanning electron microscopy (FE-SEM, Carl Zeiss-Ultra Plus, Germany) and transmission electron microscopy (TEM, FEI Tecnai G2 F20 S-Twin, USA). The crystallographic structure of the materials was determined by X-ray diffraction (XRD, D/Max-2400, Rigaku) equipped with CuK $\alpha$  radiation ( $k = 1.5418 \text{ \AA}$ ). Raman spectra were collected on an in Via Raman spectrometer (Rainie Salt Public Co. Ltd., Britain) with a laser wavelength of 514 nm. X-ray photoelectron spectroscopy (XPS) measurement was performed on an Escalab 210 system (Germany) with Al K $\alpha$  radiation source. The Brunauer-Emmett-Teller (BET) surface area of the samples was analyzed by nitrogen adsorption-desorption in a surface area and porosimetry analyzer (ASAP 2020, Micromeritics, U.S.A.).

## S2. Electrochemical measurements

All ORR performance data using a rotating disk electrode (RDE, PINE Research Instrumentation) with an Autolab bipotentiostat (Model PGSTAT128N) workstation at ambient temperature. All test was carried out using a three-electrode system, a Pt wire as counter electrode, Ag/AgCl (3.0 M KCl) as reference electrode and glassy carbon (GC) disk electrode (5 mm in diameter) are used as the working electrodes. All potentials are converted to RHE,  $E_{(\text{RHE})} = E_{(\text{Ag/AgCl})} + 0.059 \times \text{pH} + 0.197$ .

The preparation of the working electrode is as follows: 5 mg catalysis was added to 1 ml Nafion/enthol and ultrasonic dispersion for 30 min. Measuring 8  $\mu\text{l}$  drop onto the working electrode and waiting for natural dry (The catalyst loading is  $0.2038 \text{ mg cm}^{-2}$ ). Before tests, 0.1 M KOH solution should be saturated with  $\text{N}_2/\text{O}_2$ .

Calculate kinetic current density ( $J_k$ ) and electronic transfer number ( $n$ ) according to the equation Koutecky–Levich given below:

$$\frac{1}{J} = \frac{1}{J_k} + \frac{1}{B\omega^{1/2}} \quad (1)$$

$$B = 0.2nFD_0^{2/3}V^{-1/6}C_0 \quad (2)$$

where  $J$  and  $J_k$  are the measured current density and the kinetic current density, respectively.  $\omega$  is the electrode rotation speed,  $B$  could be determined from the slope of the K-L plots,  $n$  is the number of electrons transferred per oxygen molecule,  $F$  is the Faraday constant ( $96485 \text{ C mol}^{-1}$ ),  $D_0$  is the diffusion coefficient of  $O_2$  ( $1.9 \times 10^{-5} \text{ cm}^2 \text{ s}^{-1}$ ),  $V$  is the kinetic viscosity ( $0.01 \text{ cm}^2 \text{ s}^{-1}$ ), and  $C_0$  is the concentration of  $O_2$  ( $1.2 \times 10^{-6} \text{ mol cm}^{-3}$ ).

### S3. Preparation of Zn-air batteries

An Zn-air fuel cell was assembled according to the following process: First, 6 mol/L KOH was used as the electrolyte (250 mL). Then, a polished zinc foil with a thickness of about 0.2 mm and an area of 34×85 mm was used as the anode. Typically, the catalyst ink is applied to a gas diffusion layer made of nickel foam, a waterproof breathable membrane and carbon paper (effective area about 2 cm<sup>2</sup>) to make an air cathode. The catalyst ink was prepared by mixing the electrocatalyst with a 5% Nafion solution and a water/ethanol solution (1:1 (v/v)). On average, 1 mg of catalyst can be mixed with 4  $\mu\text{L}$  of Nafion solution. Small amounts of Nafion were used mainly to immobilize the electrocatalyst with negligible hydrophobicity. The loading of air electrode with electrocatalyst is 1 mg cm<sup>-2</sup>. The discharge polarization curve was recorded by LSV at a scan rate of 5 mV s<sup>-1</sup> on an Autolab electrochemical workstation. The specific capacity (mAh g<sup>-1</sup>) of Fe<sub>3</sub>-N-C-800 and Pt/C were calculated based on the following equations<sup>2</sup>:

$$\text{Specific capacity} = \frac{\text{discharge current} \times \text{working time}}{\text{mass of consumed zinc}} \quad (5)$$

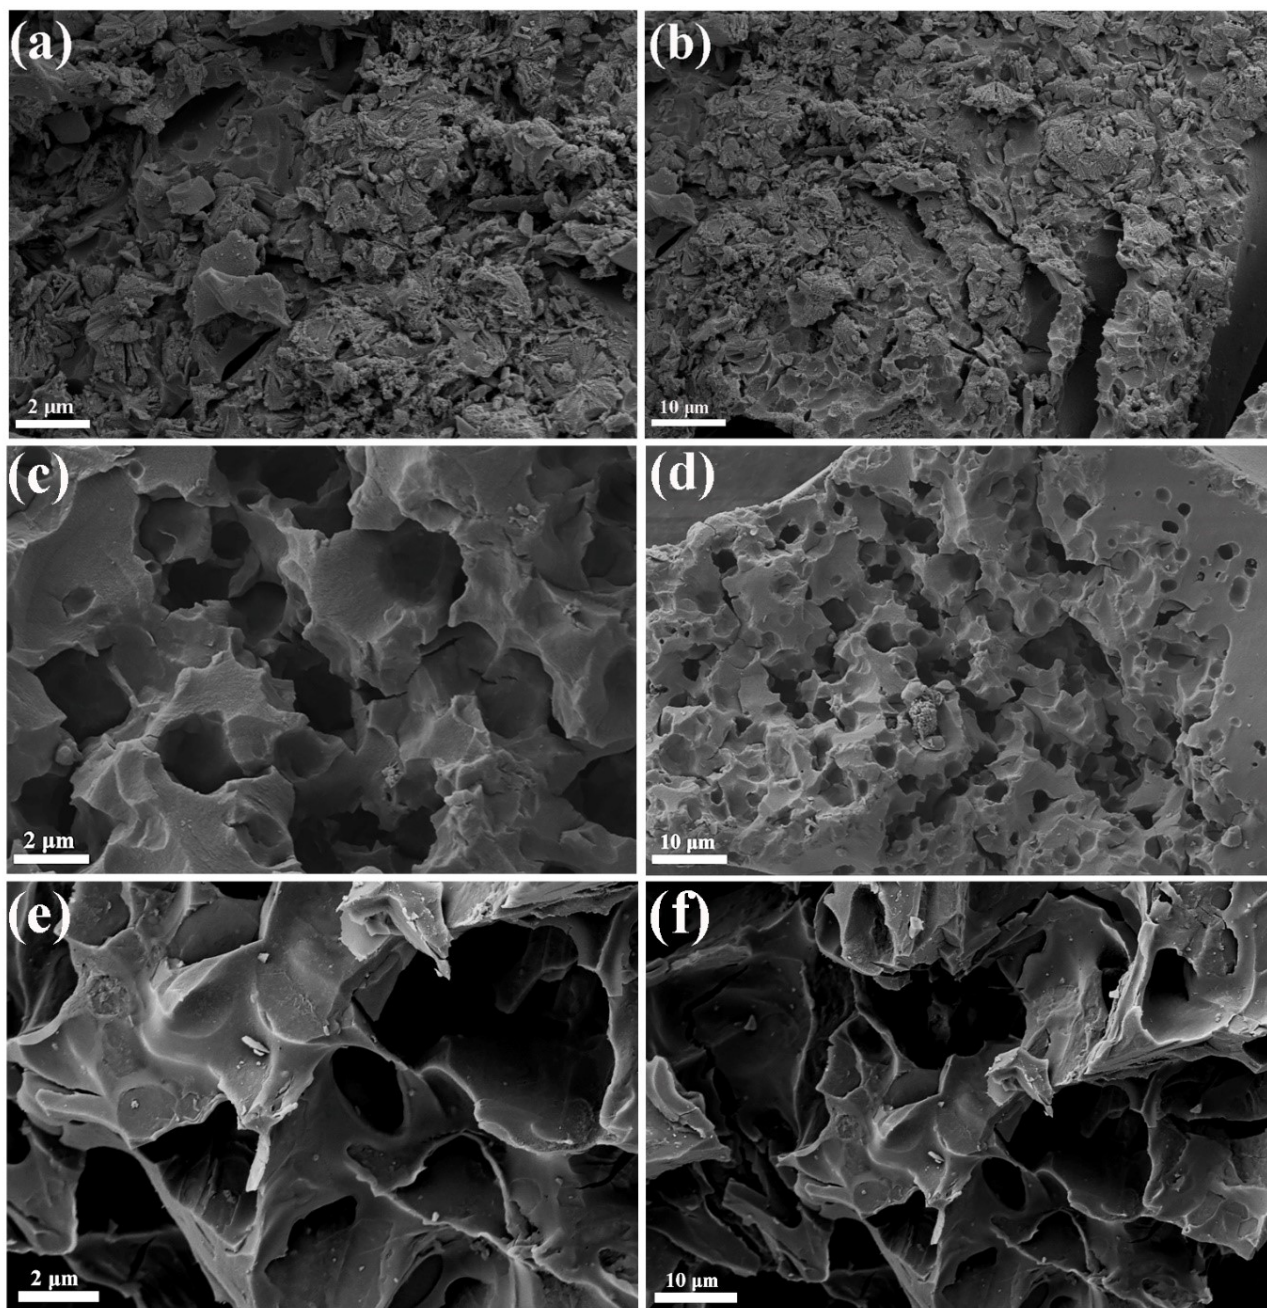

**Fig. S1** SEM images of (a-b) N-C-800, (c-d) Fe<sub>1</sub>-N-C-800 and (e-f) Fe<sub>5</sub>-N-C-800.

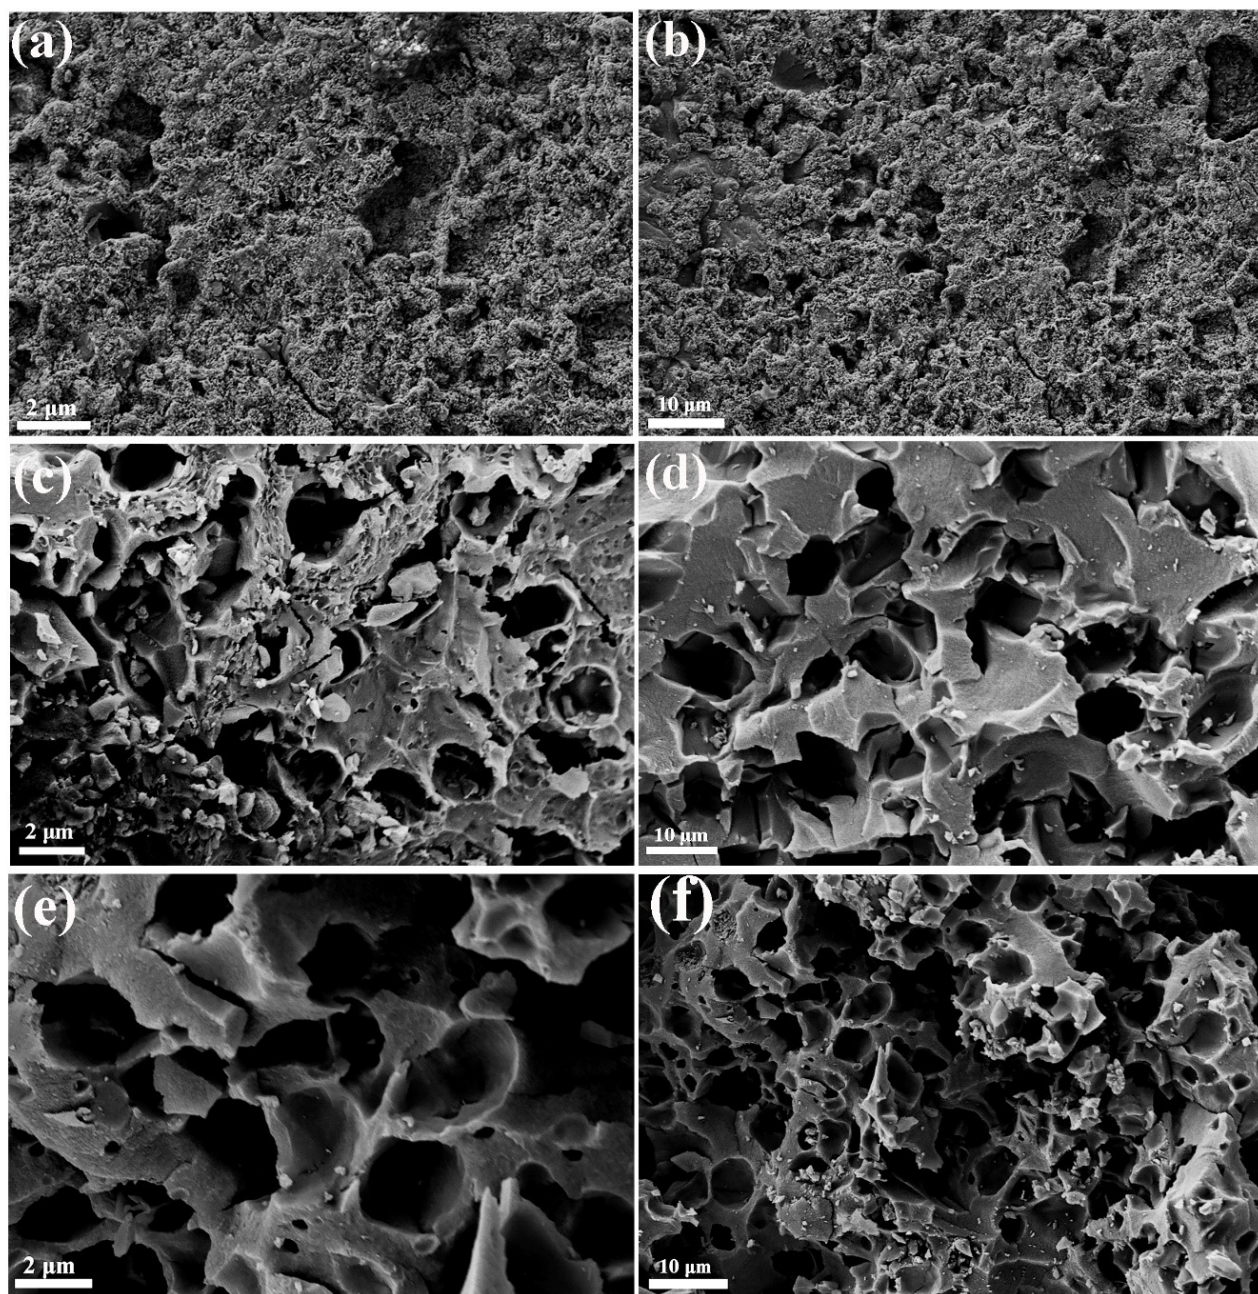

**Fig. S2** SEM images of (a-b) Fe<sub>3</sub>-N-C-700, (c-d) Fe<sub>3</sub>-N-C-800, and (e-f) Fe<sub>3</sub>-N-C-900.

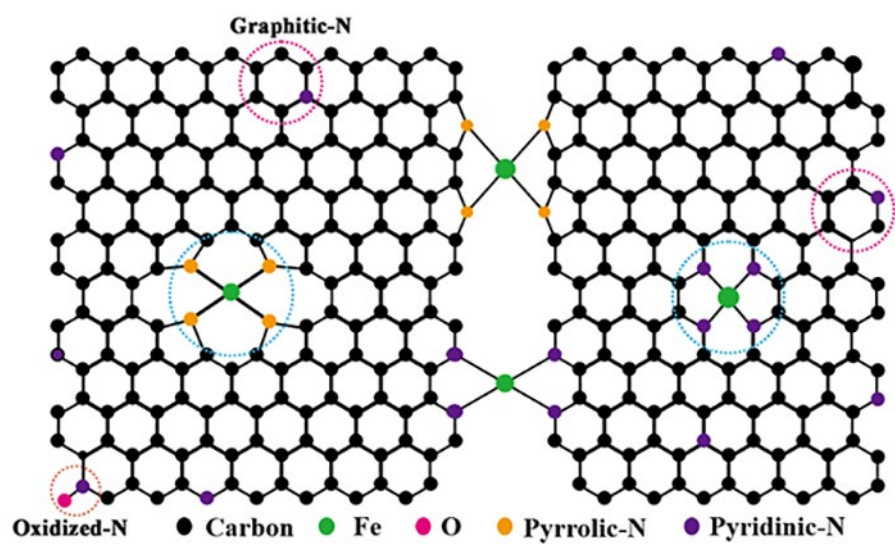

**Fig. S3** Putative Fe-N<sub>x</sub> ORR active site and molecular model structures.

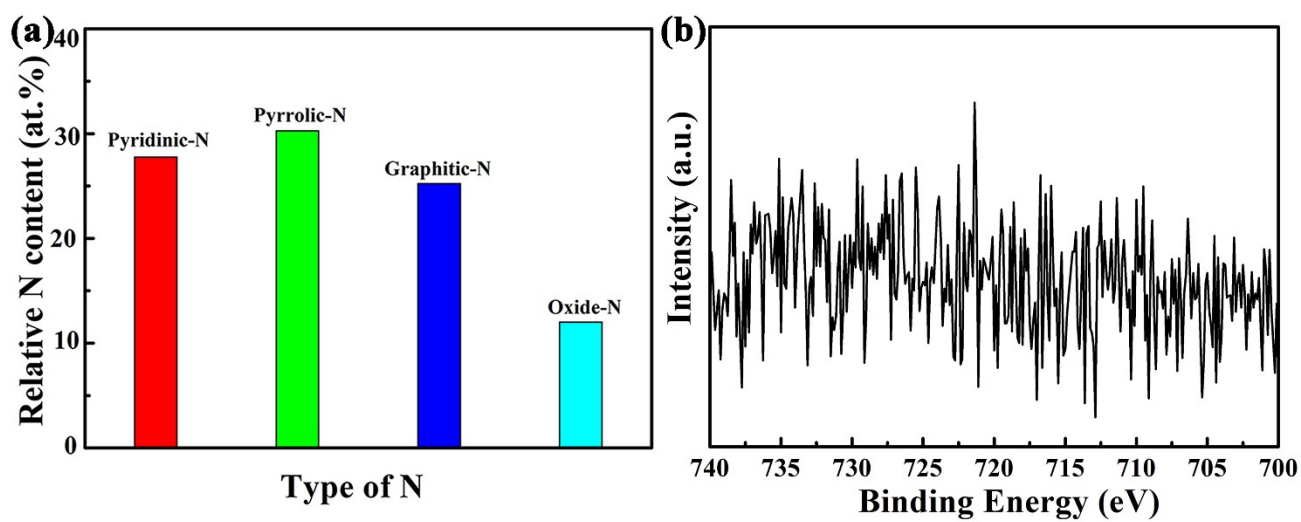

**Fig. S4** (a) Fitted data of different N species in Fe<sub>3</sub>-N-C-800. (b) High-resolution Fe 2p spectrum of Fe<sub>3</sub>-N-C-800.

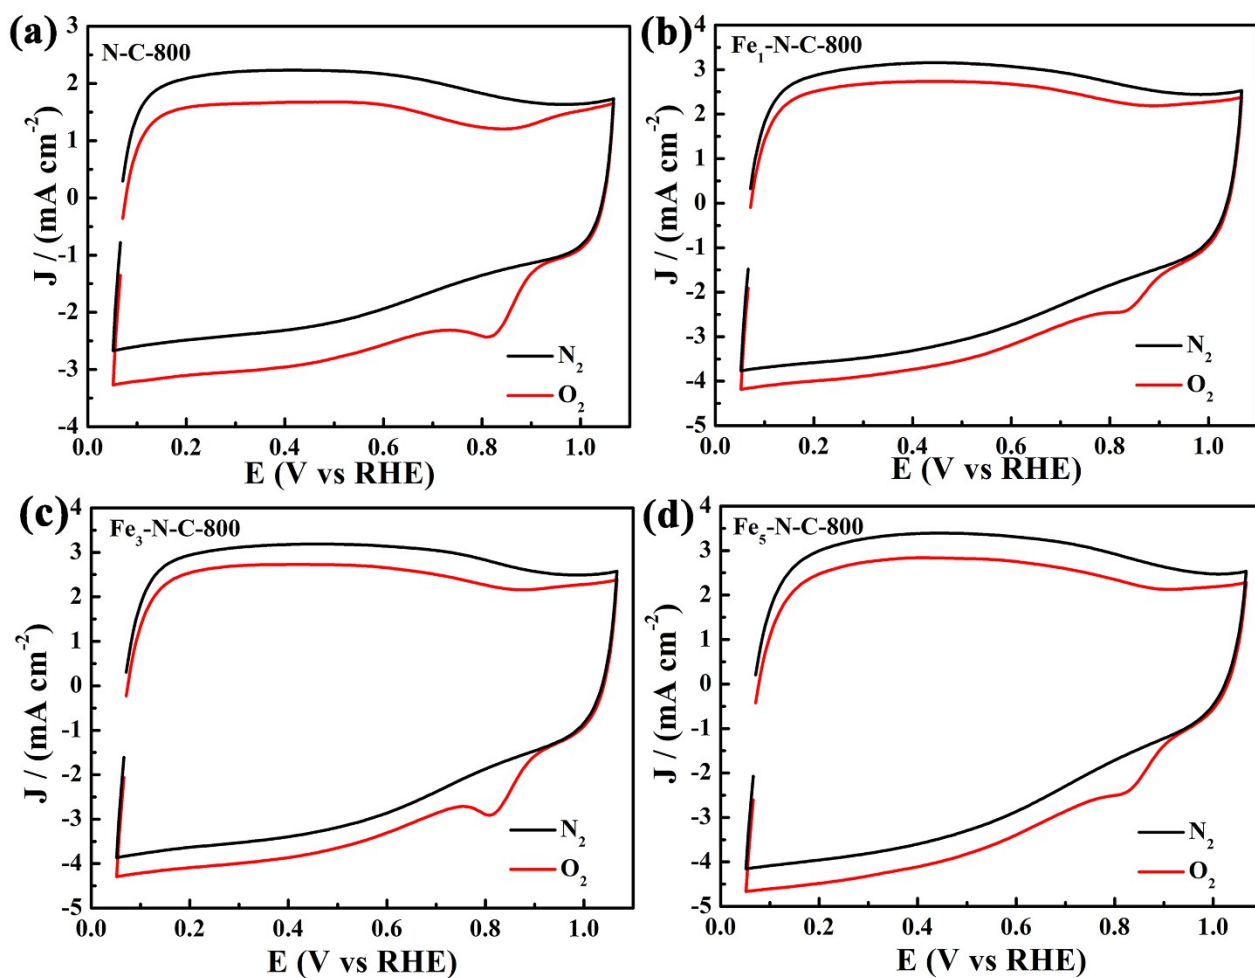

**Figure S5.** CV curves of catalysts at  $\text{N}_2$  saturation (solid line) and  $\text{O}_2$  saturation (dashed line) with 0.1 M KOH (scan rate:  $50 \text{ mV s}^{-1}$ ): (a) N-C-800, (b)  $\text{Fe}_1\text{-N-C-800}$ , (c)  $\text{Fe}_3\text{-N-C-800}$ , (d)  $\text{Fe}_5\text{-N-C-800}$ .

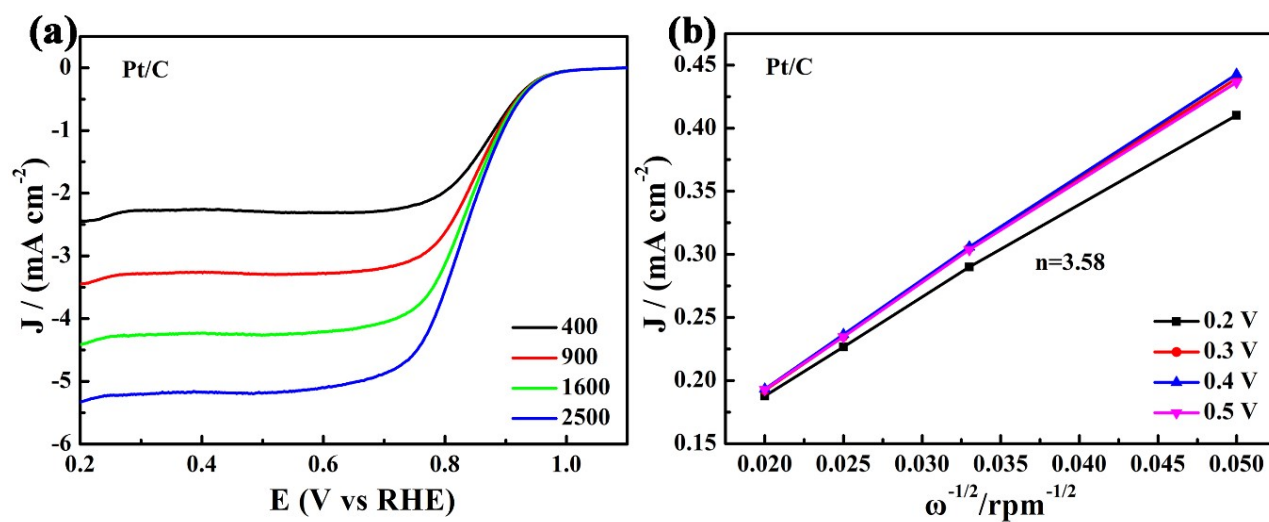

**Fig. S6** (a) LSV curves of the 20% Pt/C in O<sub>2</sub>-saturated 0.1 M KOH solution with various rotation rates. (b) The K-L plots of 20% Pt/C at different potential

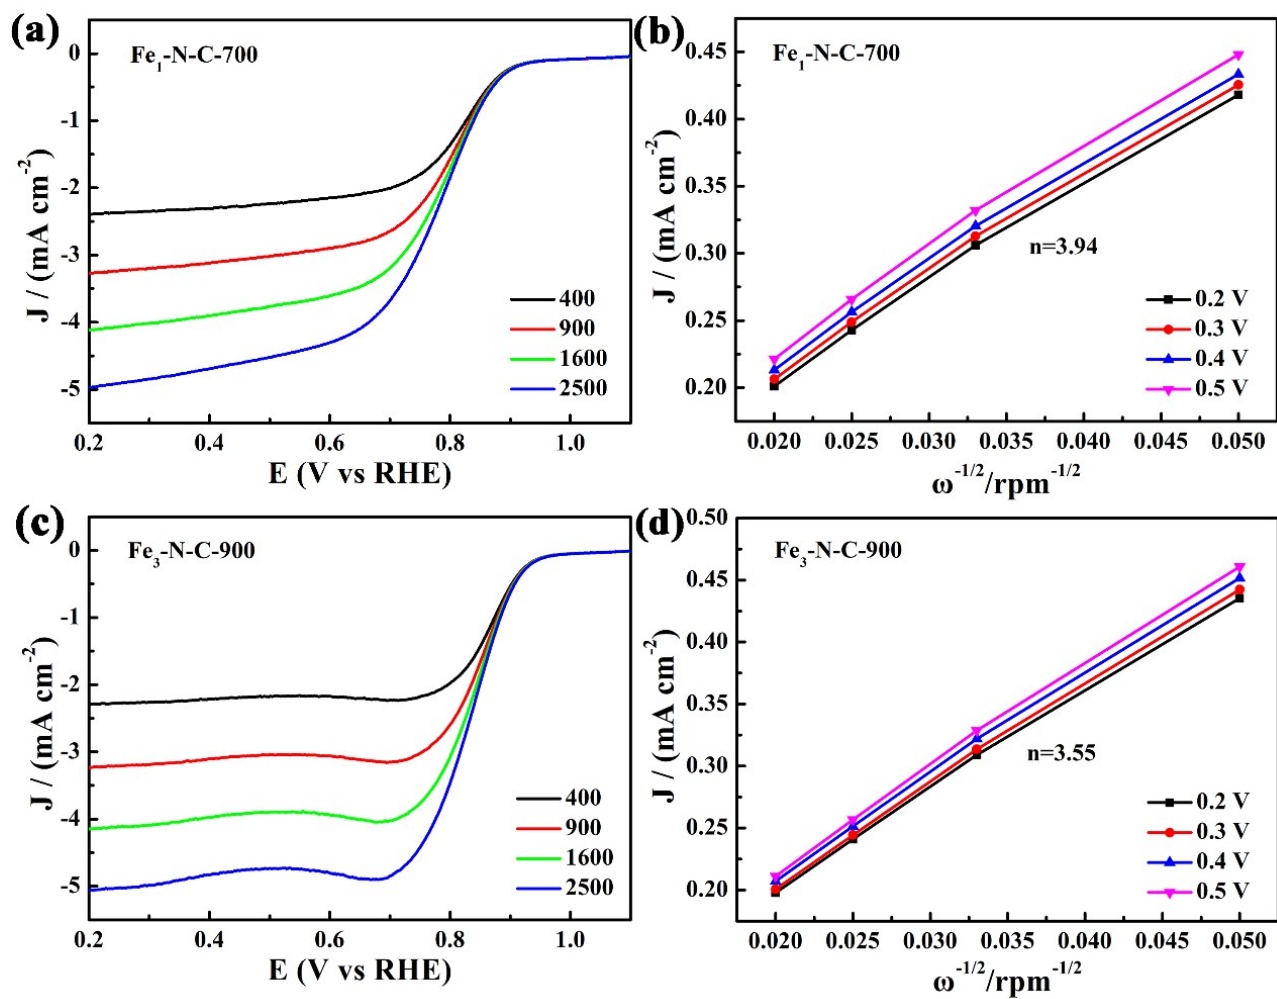

**Fig. S7** LSV curves of the (a) Fe<sub>3</sub>-N-C-700 and (c) Fe<sub>3</sub>-N-C-900 in O<sub>2</sub>-saturated 0.1 M KOH solution with various rotation rates. The K-L plots of (b) Fe<sub>3</sub>-N-C-700 and (d) Fe<sub>3</sub>-N-C-900 at different potentials.

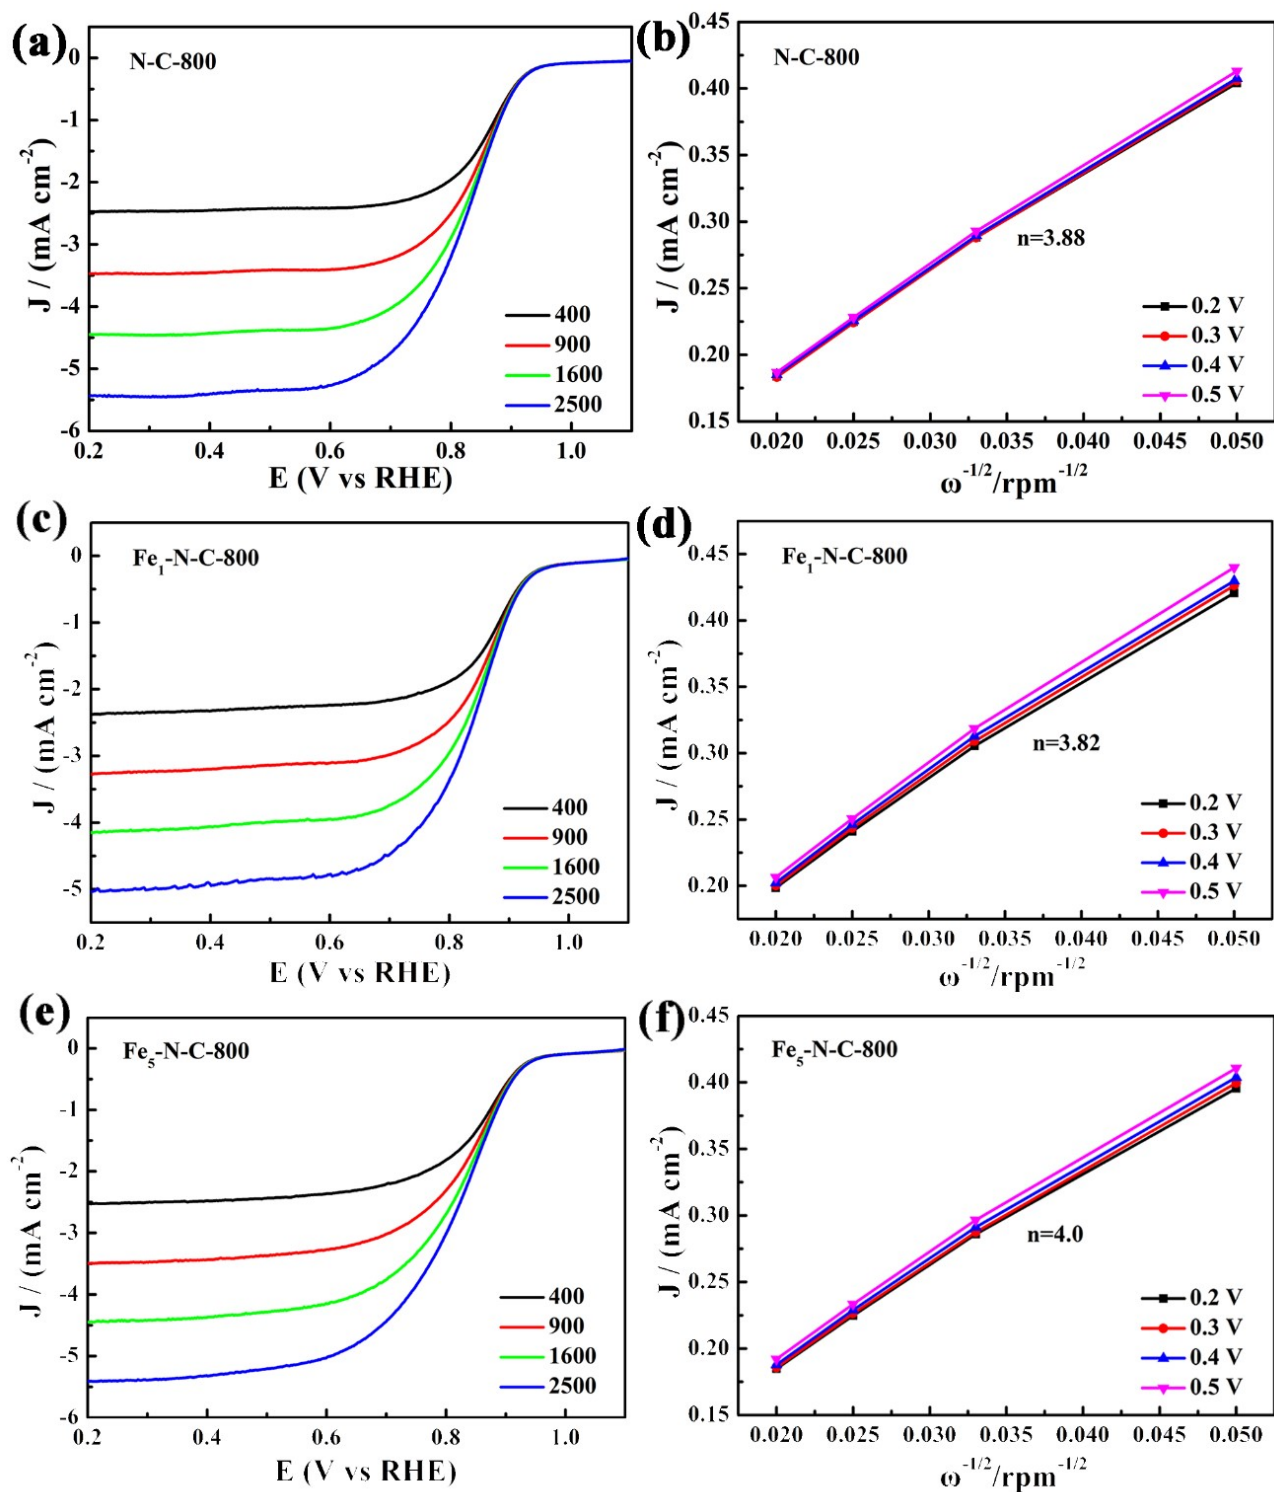

**Fig. S8** LSV curves of the (a) N-C-800, (c) Fe<sub>1</sub>-N-C-800 and (e) Fe<sub>5</sub>-N-C-800 in O<sub>2</sub>-saturated 0.1 M KOH solution with various rotation rates. The K-L plots of (b) N-C-800, (d) Fe<sub>1</sub>-N-C-800 and (f) Fe<sub>5</sub>-N-C-800 at different potentials.

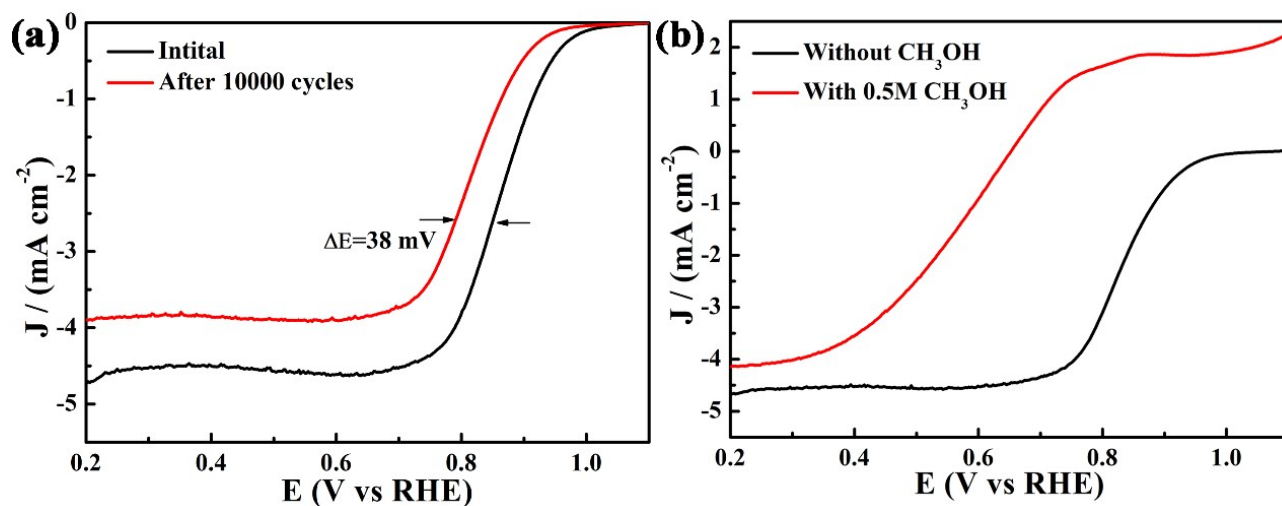

**Fig. S9** (a) ORR polarization curve before and after 10000 cycles of the 20% Pt/C. (b) ORR polarization curves of 20% Pt/C in  $O_2$ -saturated 0.1 M KOH with and without 0.5 M  $CH_3OH$  at 1600 rpm

**Table S1.** Element content of Fe<sub>3</sub>-N-C-800

| Samples                       | Surface atomic concentration (at%) |      |      |      |
|-------------------------------|------------------------------------|------|------|------|
|                               | C                                  | N    | O    | Fe   |
| <b>Fe<sub>3</sub>-N-C-800</b> | 90.97                              | 2.98 | 5.90 | 0.15 |

**Table S2.** Comparison of zinc-air battery performance of Fe<sub>3</sub>-N-C-800 catalyst with recently reported electrocatalysts.

| Catalyst                                  | Cycling conditions<br>(mW cm <sup>-2</sup> ) | Stability                 | Power density<br>(mW cm <sup>-2</sup> ) | Refs.     |
|-------------------------------------------|----------------------------------------------|---------------------------|-----------------------------------------|-----------|
| Fe <sub>3</sub> -N-C-800                  | 10                                           | 80 h                      | 80                                      | This work |
| Fe/Fe <sub>3</sub> C@Fe-N <sub>x</sub> -C | 5                                            | 1 h/cycle for 200 h       | 147                                     | [S1]      |
| L-FeNC                                    | 2                                            | 5000 s                    | 140                                     | [S2]      |
| Co-POC                                    | 2                                            | 237 cycles for 79 h       | 78                                      | [S3]      |
| Co/Co-N <sub>x</sub> -PCNSs               | 5                                            | 60 min/cycle for<br>120 h | 140                                     | [S4]      |
| Fe@Fe <sub>SA</sub> -N-C-900              | /                                            | 1 h/cycle for 500 h       | 110                                     | [S5]      |
| Co <sub>3</sub> O <sub>4</sub> @POF       | 5                                            | 2250 cycles for<br>375 h  | 222.2                                   | [S6]      |
| Fe/Fe <sub>3</sub> C-N-CNTs               | 5                                            | 1 h/cycle for 195 h       | 183                                     | [S7]      |
| MnO/Co-CNTs                               | 10                                           | 46 h                      | /                                       | [S8]      |

## References

- [S1] L. Zong, X. Chen, S. Liu, K. Fan, S. Dou, J. Xu, X. Zhao, W. Zhang, Y. Zhang, W. Wu, F. Lu, L. Cui, X. Jia, Q. Zhang, Y. Yang, J. Zhao, X. Li, Y. Deng, Y. Chen and L. Wang, *J. Energy Chem*, 2021, 56, 72-79.
- [S2] X. Jiang, J. Chen, F. Lyu, C. Cheng, Q. Zhong, X. Wang, A. Mahsud, L. Zhang and Q. Zhang, *J. Energy Chem*, 2021, 59, 482-491.
- [S3] B. Li, C. Zhao, S. Chen, J. Liu, X. Chen, L. Song and Q. Zhang, *Adv. Mater*, 2019, 31, 1900592.
- [S4] W. Wu, L. Zong, X. Chen, W. Zhang, L. Cui, Y. Yang, X. Wang, S. Li and L. Wang, *Appl. Surf. Sci*, 2021, 541, 148262.
- [S5] W. Zhang, K. Fan, C.-H. Chuang, P. Liu, J. Zhao, D. Qi, L. Zong and L. Wang, *J. Energy Chem*, 2021, 61: 612-621.
- [S6] J. Liu, B. Li, C. Zhao, J. Yu and Q. Zhang, *ChemSusChem*, 2020, 13, 1529-1536.
- [S7] L. Zong, X. Chen, S. Dou, K. Fan, Z. Wang, W. Zhang, Y. Du, J. Xu, X. Jia, Q. Zhang, X. Li, Y. Deng, Y. Chen and L. Wang, *Chin Chem Lett*, 2021, 32, 1121-1126.
- [S8] W. Zhang, L. Zong, K. Fan, L. Cui, Q. Zhang, J. Zhao, L. Wang and S. Feng, *J. Alloys Compd*, 2021, 874, 159965.
